# Supplementary material
Source: PubMed Central journal article supplement (PMC4668926)
Supplement: NIHMS739795-supplement-SI.pdf [file NIHMS739795-supplement-SI.pdf]

**Supporting Information Figure 1.** Structure-based sequence alignment showing that the dimer interface has a low level of conservation. Residues in the dimer interface are highlighted in grey. Residues that are part of the hydrophobic cluster in the interface are highlighted in yellow.

| <b>DIMERS</b>             |                                                                                                      |
|---------------------------|------------------------------------------------------------------------------------------------------|
| <i>S. aureus</i>          | 176 INSI <b>T</b> ALG-RQTV-AIMHNPE <b>I</b> RILCR 200...260 YRRAREHNLDTPYLD <b>T</b> IYSFLRAYQQN 286 |
| <i>M. capsulatus</i>      | 193 FNPLSVLSGGDLTLDILST--QEGFVR 217...276 VRAGRRTVAIPHLESVYALMKLLELR 302                             |
| <i>R. Solanacearum</i>    | 211 MNPVSVLT-GATCDRILLDDPLVSAFCL 236...295 REIGLHVGVPTPQIDTLLGLVRLHAQT 321                           |
| <i>M. tuberculosis</i>    | 184 -AGFMVLS-GRRS-AMFRRDDVAALSR 207...267 VRKARAHGLATPISDVLVPLAAASDG 293                             |
| <i>R. eutropha</i>        | 185 YNALSAIT-QLPYGRLVRGEGVEAVMR 210...269 VRRGDALGIPVPANRVLHALVRLIEDK 295                            |
| <i>B. subtilis</i>        | 186 INPLTALL-QVKNGELLTPAYLAFMK 211...267 LKEASLQGLDAVHLEFLYGSIKALE-- 291                             |
| <i>E. faecalis</i>        | 195 LNGLCTIL-DCNIAEFGALPVSESLVK 210...283 WRKGQKYNVATPFCAMLTQLVHGKEEL 309                            |
| <b>MONOMERS</b>           |                                                                                                      |
| <i>E. coli</i>            | 183 INPLTAIW-NCPN-GELRH--HPQEIM 205...265 LRRARAHGIAVPENTRLFEMVKKKESE 291                            |
| <i>G. Metallireducens</i> | 191 FNGLCALL-QQPVNLILARDVSRKLVK 216...277 LAYGAREGIAMPVEMLATLLEQATGE 303                             |
| <i>P. Gingivalis</i>      | 205 TATA <b>T</b> AYF-DKPIGSILTE--HEPELL 228...288 VREAELRVDLPMYKRMVRELVS--- 310                     |
